# Supplementary material for: Interface, vacancy, and morphology engineering synergistically improve In2S3@Cu2S electrocatalytic performance for pH-universal HER
Source: Royal Society of Chemistry journal article supplement (doi:10.1039/d2ta07969k), 2023-01-01
Supplement: d2ta07969k1.pdf [file d2ta07969k1.pdf]

## Supplementary Information

### Interface, vacancy and morphology engineering synergistically improve $\text{In}_2\text{S}_3@\text{Cu}_2\text{S}$ electrocatalytic performance for pH-universal HER

Yongkai Sun<sup>a</sup>, Wenyuan Sun<sup>b</sup>, Guicun Li<sup>b</sup>, Lei Wang<sup>c</sup>, Jianfeng Huang<sup>d</sup>, Alan Meng<sup>c,\*</sup> and Zhenjiang Li<sup>b,\*</sup>

<sup>a</sup>College of Electromechanical Engineering, Qingdao University of Science and Technology, Qingdao 266061, Shandong, P. R. China

<sup>b</sup> College of Materials Science and Engineering, Qingdao University of Science and Technology, Qingdao 266042, Shandong, P. R. China

<sup>c</sup> Key Laboratory of Optic-electric Sensing and Analytical Chemistry for Life Science MOE, College of Chemistry and Molecular Engineering, Qingdao University of Science and Technology, Qingdao 266042, Shandong, P. R. China

<sup>d</sup> School of Material Science and Engineering, International S&T Cooperation Foundation of Shaanxi Province, Xi'an Key Laboratory of Green Manufacture of Ceramic Materials, Shaanxi University of Science and Technology, Xi'an 710021, Shanxi, P. R. China.

\* Corresponding author. Tel.: +86 532 88956228; fax: +86 532 88956228.

E-mail address: [zhenjiangli@qust.edu.cn](mailto:zhenjiangli@qust.edu.cn) (Zhenjiang Li)

E-mail address: [alanmengqust@163.com](mailto:alanmengqust@163.com) (Alan Meng)

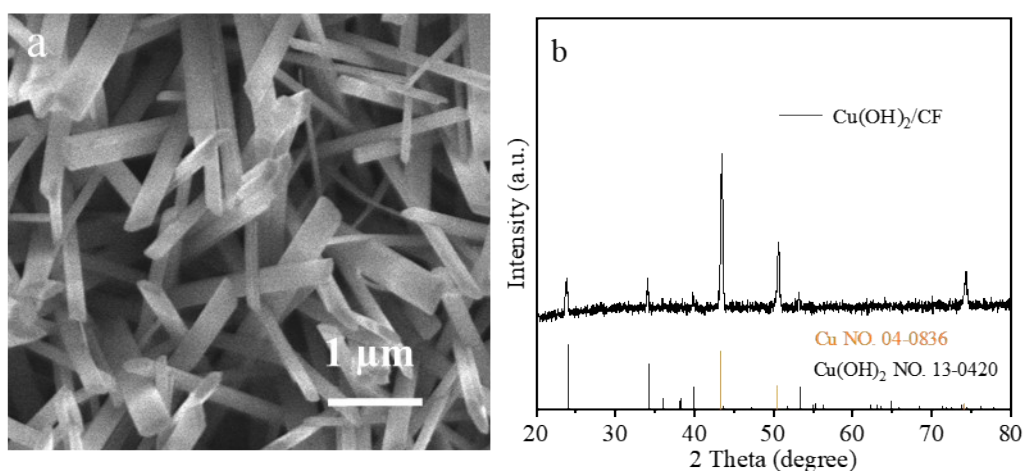

**Fig. S1.** The SEM (a) image and XRD pattern (b) of  $\text{Cu}(\text{OH})_2/\text{CF}$

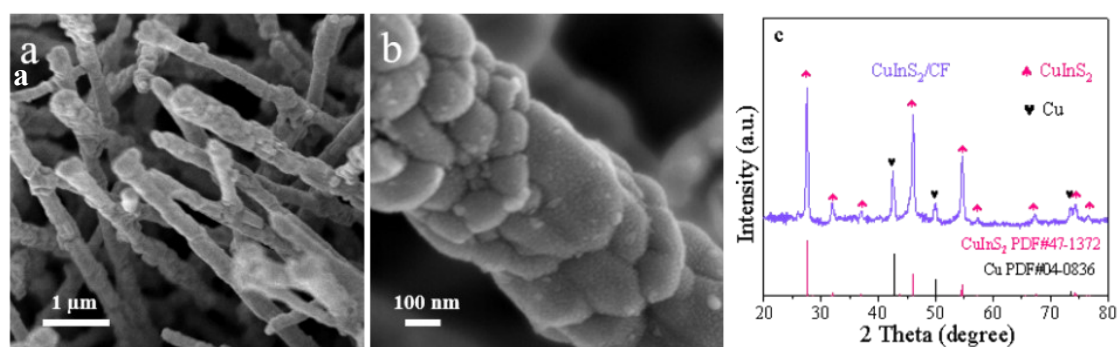

**Fig. S2.** The SEM (a, b) image and XRD pattern (c) of  $\text{CuInS}_2/\text{CF}$ .

**Fig. S3.** The SEM image of (a)  $\text{In}_2\text{S}_3@\text{Cu}_2\text{S}$  NAs/CF-1 and (b)  $\text{In}_2\text{S}_3@\text{Cu}_2\text{S}$  NAs/CF-3.

**Table S1** the atomic percentage of each element in  $\text{In}_2\text{S}_3@\text{Cu}_2\text{S}$  NAs/CF-2 from XPS and EDS.

|    | XPS Atomic conc. [%] | EDS Atomic conc. [%] |
|----|----------------------|----------------------|
| Cu | 31.53                | 29.55                |
| In | 22.87                | 26.82                |
| S  | 45.6                 | 43.63                |

**Fig. S4.** Voltammograms of the (a)  $\text{In}_2\text{S}_3@\text{Cu}_2\text{S}/\text{CF}$ -1, (b)  $\text{In}_2\text{S}_3@\text{Cu}_2\text{S}/\text{CF}$ -2, (c)  $\text{In}_2\text{S}_3@\text{Cu}_2\text{S}/\text{CF}$ -3 and (d)  $\text{Cu}_2\text{S}/\text{CF}$  at various scan rates (10-50  $\text{mV s}^{-1}$ ) in 0.5 M  $\text{H}_2\text{SO}_4$ .

**Table S2** The charge transfer resistances obtained from Nyquist plots in 0.5 M  $\text{H}_2\text{SO}_4$  solution.

| Samples                                                 | $R_{ct}$ ( $\Omega$ ) | $R_s$ ( $\Omega$ ) |
|---------------------------------------------------------|-----------------------|--------------------|
| $\text{In}_2\text{S}_3@\text{Cu}_2\text{S}/\text{CF}-1$ | 8.48                  | 1.093              |
| $\text{In}_2\text{S}_3@\text{Cu}_2\text{S}/\text{CF}-2$ | 2.32                  | 0.8122             |
| $\text{In}_2\text{S}_3@\text{Cu}_2\text{S}/\text{CF}-3$ | 5.09                  | 0.9236             |
| $\text{Cu}_2\text{S}/\text{CF}$                         | 14.72                 | 1.16               |

**Fig. S5.** Voltammograms of the (a)  $\text{In}_2\text{S}_3@\text{Cu}_2\text{S}/\text{CF}-1$ , (b)  $\text{In}_2\text{S}_3@\text{Cu}_2\text{S}/\text{CF}-2$ , (c)  $\text{In}_2\text{S}_3@\text{Cu}_2\text{S}/\text{CF}-3$  and (d)  $\text{Cu}_2\text{S}/\text{CF}$  at various scan rates ( $10-50 \text{ mV s}^{-1}$ ), (e)  $C_{dl}$  and (f) EIS of  $\text{In}_2\text{S}_3@\text{Cu}_2\text{S}/\text{CF}-1$ ,  $\text{In}_2\text{S}_3@\text{Cu}_2\text{S}/\text{CF}-2$ ,  $\text{In}_2\text{S}_3@\text{Cu}_2\text{S}/\text{CF}-3$ , and  $\text{Cu}_2\text{S}/\text{CF}$  in 1M KOH.

**Table S3** The charge transfer resistances obtained from Nyquist plots in 1 M KOH solution.

| Samples                                                   | $R_{ct}$ ( $\Omega$ ) | $R_s$ ( $\Omega$ ) |
|-----------------------------------------------------------|-----------------------|--------------------|
| $\text{In}_2\text{S}_3@\text{Cu}_2\text{S}/\text{CF}-1$   | 7.83                  | 0.8851             |
| $\text{In}_2\text{S}_3@\text{Cu}_2\text{S} / \text{CF}-2$ | 3.29                  | 1.081              |
| $\text{In}_2\text{S}_3@\text{Cu}_2\text{S} / \text{CF}-3$ | 6.24                  | 0.6742             |
| $\text{Cu}_2\text{S}/\text{CF}$                           | 15.36                 | 1.154              |

**Fig. S6.** Voltammograms of the (a)  $\text{In}_2\text{S}_3@\text{Cu}_2\text{S}/\text{CF}-1$ , (b)  $\text{In}_2\text{S}_3@\text{Cu}_2\text{S}/\text{CF}-2$ , (c)  $\text{In}_2\text{S}_3@\text{Cu}_2\text{S}/\text{CF}-3$  and (d)  $\text{Cu}_2\text{S}/\text{CF}$  at various scan rates ( $10-50 \text{ mV s}^{-1}$ ), (e)  $C_{dl}$  and (f) EIS of  $\text{In}_2\text{S}_3@\text{Cu}_2\text{S}/\text{CF}-1$ ,  $\text{In}_2\text{S}_3@\text{Cu}_2\text{S}/\text{CF}-2$ ,  $\text{In}_2\text{S}_3@\text{Cu}_2\text{S}/\text{CF}-3$ , and  $\text{Cu}_2\text{S}/\text{CF}$  in 1M PBS.

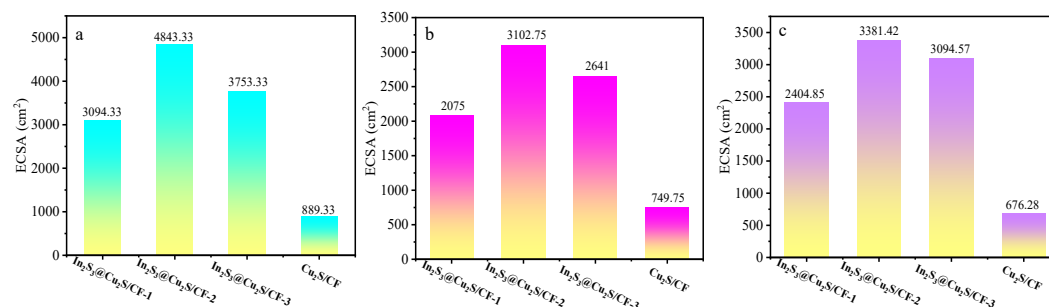

**Fig. S7.** The ECSA of  $\text{In}_2\text{S}_3@\text{Cu}_2\text{S}/\text{CF}-1$ ,  $\text{In}_2\text{S}_3@\text{Cu}_2\text{S}/\text{CF}-2$ ,  $\text{In}_2\text{S}_3@\text{Cu}_2\text{S}/\text{CF}-3$  and  $\text{Cu}_2\text{S}/\text{CF}$  in (a) 0.5 M H<sub>2</sub>SO<sub>4</sub>, (b) 1 M KOH and (c) 1 M PBS.

**Table S4** The charge transfer resistances obtained from Nyquist plots in 1 M PBS solution.

| Samples                                                   | $R_{ct}$ ( $\Omega$ ) | $R_s$ ( $\Omega$ ) |
|-----------------------------------------------------------|-----------------------|--------------------|
| $\text{In}_2\text{S}_3@\text{Cu}_2\text{S}/\text{CF}-1$   | 6.28                  | 1.105              |
| $\text{In}_2\text{S}_3@\text{Cu}_2\text{S} / \text{CF}-2$ | 3.55                  | 1.074              |
| $\text{In}_2\text{S}_3@\text{Cu}_2\text{S} / \text{CF}-3$ | 7.66                  | 0.8565             |
| $\text{Cu}_2\text{S}/\text{CF}$                           | 19.29                 | 1.744              |

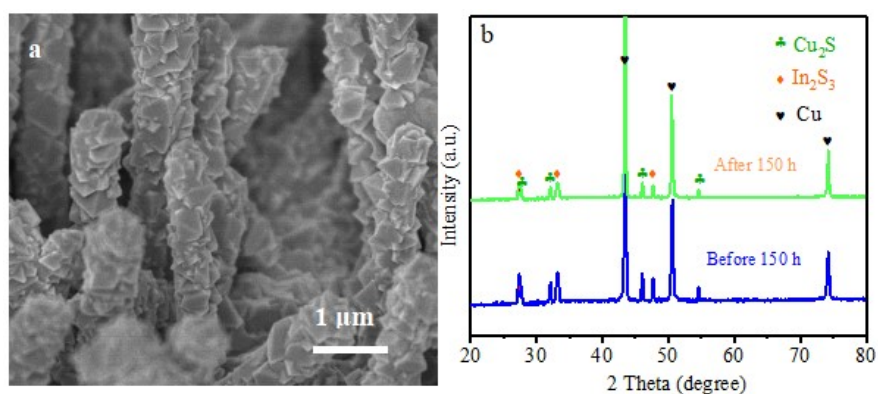**Fig. S8.** The SEM image (a) and XRD pattern (b) of  $\text{In}_2\text{S}_3@\text{Cu}_2\text{S}/\text{CF}-2$  after performing a 150 h test.**Table S5** HER activity comparison between  $\text{In}_2\text{S}_3@\text{Cu}_2\text{S}/\text{CF}-2$  with the recently reported pH-universal non-noble-metal catalysts in different solutions. ( $\eta_{10}$ : Overpotentials at a current density of  $10 \text{ mA cm}^{-2}$ )

| Catalysts                                  | 0.5 M $\text{H}_2\text{SO}_4$ | 1 M PBS          | 1M KOH           | Ref. |
|--------------------------------------------|-------------------------------|------------------|------------------|------|
|                                            | $\eta_{10}$ (mV)              | $\eta_{10}$ (mV) | $\eta_{10}$ (mV) |      |
| NiCoP/NF                                   | 105                           | 97               | 98               | 1    |
| $\text{W}_2\text{C}/\text{WP}@\text{NC}-2$ | 196.2                         | /                | 116.37           | 2    |
| Fe- $\text{Mo}_2\text{C}@\text{NCF}$       | 129                           | 130              | 65               | 3    |
| W-MoP                                      | 63                            | 71               | 82               | 4    |
| Co-P@PC                                    | 72                            | 91               | /                | 5    |

|                                                        |     |     |     |           |
|--------------------------------------------------------|-----|-----|-----|-----------|
| S-MoP NPL                                              | 86  | 142 | 104 | 6         |
| CoMoNiS-NF-31                                          | 103 | 117 | 113 | 7         |
| MoS <sub>2</sub> /NLG-3                                | 110 | 142 | 145 | 8         |
| MoP/Mo <sub>2</sub> N                                  | 89  | 91  | 89  | 9         |
| Co <sub>0.5</sub> W <sub>0.5</sub> S <sub>x</sub>      | 200 | 198 | 189 | 10        |
| MoPS                                                   | 92  | /   | 158 | 11        |
| Cu@WC                                                  | 92  | 173 | 119 | 12        |
| Fe-(NiS <sub>2</sub> /MoS <sub>2</sub> )/CNT           | 98  | 127 | 87  | 13        |
| MoS <sub>2</sub> /NLG-3/CFP                            | 110 | 142 | 145 | 14        |
| Co <sub>0.97</sub> Ti <sub>0.03</sub> SP               | 44  | /   | 132 | 15        |
| In <sub>2</sub> S <sub>3</sub> @Cu <sub>2</sub> S/CF-2 | 42  | 78  | 61  | This work |

## References

- 1 L. Zhang, F. Ye, Z. Y. Wu, L. Jiang, Q. Liu, R. L. Pang, Y. Liu, L. F. Hu. *Small Methods*, 2022, 6, 2200515.**
- 2 P. Wei, X. P. Sun, M. H. Wang, J. H. Xu, Z. M. He, X. G. Li, F. Y. Cheng, Y. Xu, Q. Li, J. T. Han, H. Yang, Y. H. Huang. *ACS Appl. Mater. Inter.*, 2021, 13, 53955-53964.
- 3 J. J. Huang, J. Y. Wang, R. K. Xie, Z. H. Tian, G. L. Chai, Y. W. Zhang, F. L. Lai, G. J. He, C. T. Liu, T. X. Liu, P. R. Shearing, D. J. L. Brett. *J. Mater. Chem. A*, 2020, 8, 19879-19886.**
- 4 S. L. Fereja, P. Li, J. H. Guo, Z. Y. Fang, Z. W. Zhang, Z. H. Zhuang, X. H. Zhang, K. F. Liu, W. Chen. *ACS Appl. Nano Mater.*, 2021, 4, 5992-6001.
- 5 J. Wu, D. Wang, S. Wan, H. Liu, C. Wang, X. Wang. *Small*, 2020, 16, 1900550.
- 6 K. Liang, S. Pakhira, Z. Yang, A. Nijamudheen, L. Ju, M. Wang, C. I. Aguirre-Velez, G. E. Sterbinsky, Y. Du, Z. Feng, J. L. Mendoza-Cortes, Y. Yang. *ACS Catal.*, 2019, 9, 651-659.
- 7 Y. Yang, H. Yao, Z. Yu, S. M. Islam, H. He, M. Yuan, Y. Yue, K. Xu, W. Hao, G. Sun, H. Li, S. Ma, P. Zapol, M. G. Kanatzidis. *J. Am. Chem. Soc.*, 2019, 141, 10417-10430.
- 8 J. Y. Qin, C. Xi, R. Zhang, T. Liu, P. C. Zou, D. Y. Wu, Q. J. Guo, J. Mao, H. L. Xin, J. Yang. *ACS Catal.*, 2021, 11, 4486-4497.
- 9 Y. Gu, A. P. Wu, Y. Q. Jiao, Hu. R. Zheng, X. Q. Wang, Y. Xie, . Wang, C. G. Tian, H. G. Fu. *Angew. Chem.*, 2021, 133, 6747-6755.**
- 10 K. Fan, H. Y. Zou, N. V. R. A. Dharanipragada, L. Z. Fan, A. K. Inge, L. L. Duan, B. B. Zhang, L. C. Sun. *J. Mater. Chem. A*, 2021, 9, 11359-11369.
- 11 Y. Huang, X. Song, J. Deng, C. Zha, W. Huang, Y. Wu, Y. Li. *Appl. Catal. B: Environ.*, 2019, 245, 656-661.
- 12 M. Q. Yao, B. J. Wang, B. L. Sun, L. F. Luo, Y. J. Chen, J. W. Wang, N. Wang, S. Komarneni, X. B. Niu, W. C. Hu. *Appl. Catal. B: Environ.*, 2021, 280, 119451.
- 13 C. Y. Li, M. D. Liu, H. Y. Ding, L. Q. He, E. Z. Wang, B. L. Wang, S. S. Fan, K. Liu. *J. Mater. Chem. A*, 2020, 8, 17527-17536.
- 14 J. Y. Qin, C. Xi, R. Zhang, T. Liu, P. C. Zou, D. Y. Wu, Q. J. Guo, J. Mao, H. L. Xin, J. Yang. *ACS Catal.*, 2021, 11, 4486-4497.**
- 15 V. Q. Bui, A. Kumar, H. T. D. Bui, J. Lee, Y. Hwang, H. M. Le, Y. Kawazoe, H. Lee. *Chem.*

Mater., 2020, **32**, 9591-9601.
